# Supplementary material
Source: publisher site journal article supplement (https://www.dovepress.com/get_supplementary_file.php?f=294880.docx)

**Supplementary materials**

**Supplementary Figure S1. The validation of circular structure of circ_0071589.** The agarose gel electrophoresis for the products following qRT-PCR of circ_0071589 using divergent or convergent primers. Abbreviations: circ_0071589, hsa_circ_0071589; qRT-PCR, quantitative reverse transcription polymerase chain reaction.


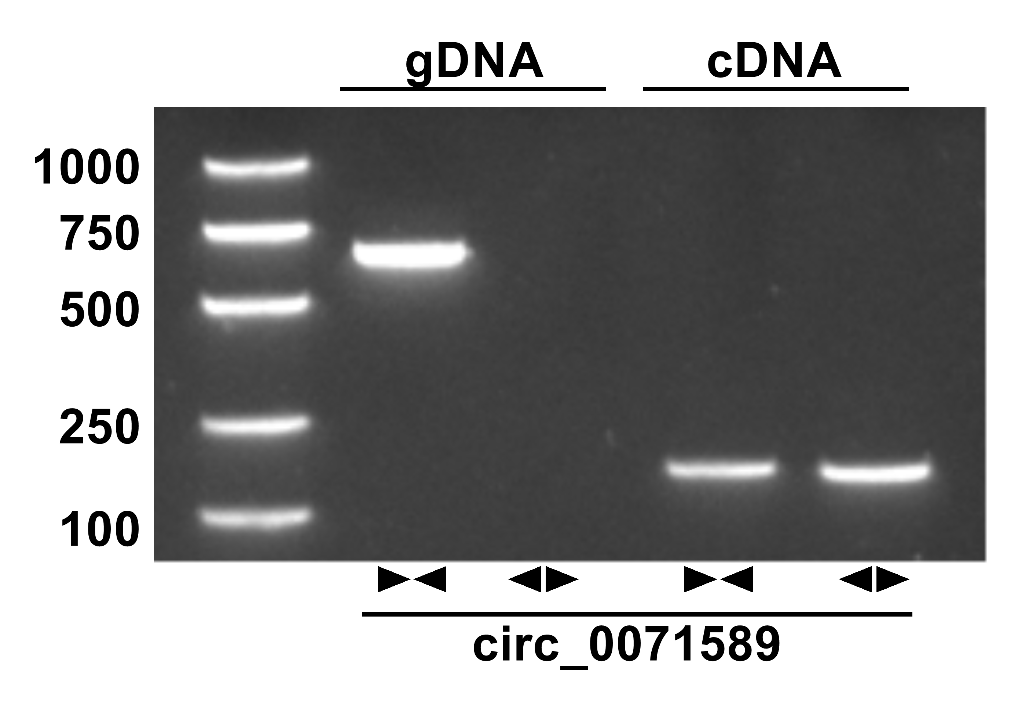


**Supplementary Figure S2. Effect of circ_0071589 on targeted miRNAs levels.** (A and B) qRT-PCR for 5 predicted miRNAs levels. **P*<0.05, versus the si-NC group. Abbreviations: miR, microRNA; CDDP, cisplatin; si-circ_0071589, siRNA for circ_0071589; si-NC, siRNA negative control.


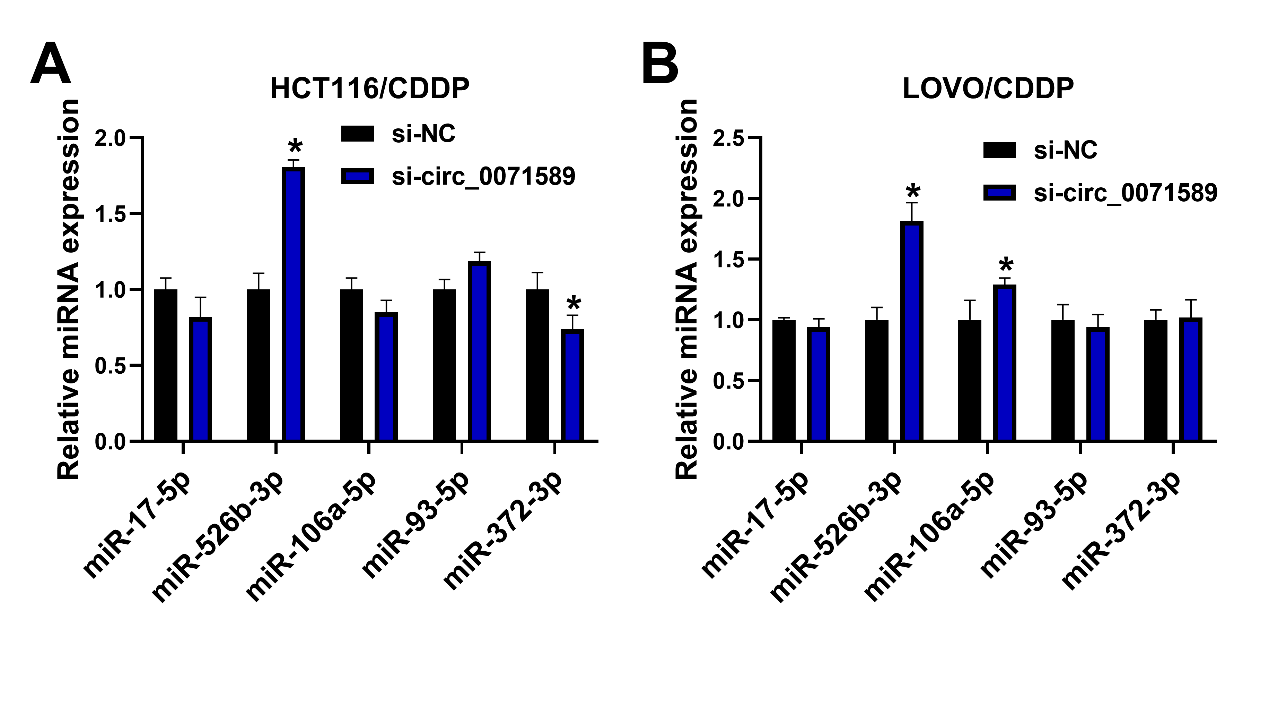


**Supplementary Figure S3. Effect of miR-526b-3p on targeted mRNAs levels.** (A and B) qRT-PCR for 5 predicted mRNAs expression. **P*<0.05, versus the miR-NC group. Abbreviations: CDDP, cisplatin; miR-NC, mimic negative control.


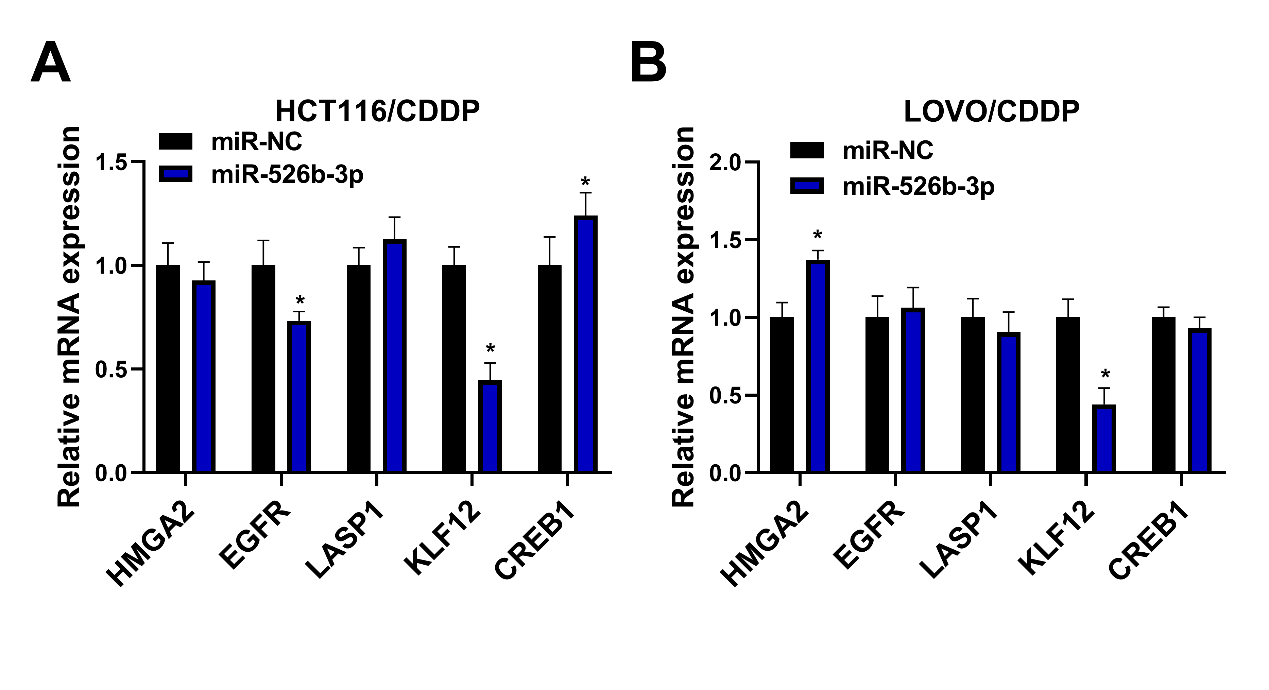

Supplement: Supplementary file 1 [file get_supplementary_file.php]
